# Supplementary material for: Satellite-based, top-down approach for the adjustment of aerosol precursor emissions over East Asia: The Geostationary Environment Monitoring Spectrometer (GEMS) data fusion product and its proxies
Source: Copernicus journal article supplement (doi:10.5194/egusphere-2023-87), 2023-01-30
Supplement: Supplementary file 1 [file egusphere-2023-87-supplement-version2.zip]

*Supplement of*

**Satellite-based, top-down approach for the adjustment of aerosol precursor emissions over East Asia: TROPOMI product, and the Geostationary Environment Monitoring Spectrometer (GEMS) data fusion product and its proxy**

Jincheol Park and Jia Jung et al.

*Correspondence to:* Yunsoo Choi (ychoi6@uh.edu)

**Table S1. Model configurations.**

| WRF 3.8                                             |                                                                                                                    |
|-----------------------------------------------------|--------------------------------------------------------------------------------------------------------------------|
| Domain                                              | East Asia on 27 km × 27 km grids                                                                                   |
| Microphysics                                        | Morrison double-moment scheme (Morrison <i>et al.</i> , 2009)                                                      |
| Longwave and shortwave radiation                    | Rapid Radiative Transfer Model for GCMs (RRTMG) (Clough <i>et al.</i> , 2005; Iacono <i>et al.</i> , 2008)         |
| Land surface                                        | Pleim-Xiu land surface model (Xiu and Pleim, 2001)                                                                 |
| Surface layer                                       | Pleim-Xiu surface layer (Pleim, 2006)                                                                              |
| Planetary boundary layer                            | ACM2 planetary boundary layer model (Pleim 2007a, 2007b)                                                           |
| Cumulus parameterization                            | Kain-Fritch (new Eta) scheme (Kain, 2004)                                                                          |
| Four-Dimensional Data Assimilation                  | FDDA option for grid-nudging (Jeon <i>et al.</i> , 2015)                                                           |
| Initial and boundary conditions<br>for meteorology  | 1° × 1° National Centers for Environmental Prediction (NCEP) FNL (final)<br>operational model global analysis data |
| CMAQ 5.2 and CMAQ DDM-3D 5.2                        |                                                                                                                    |
| Horizontal advection                                | YAMO                                                                                                               |
| Vertical advection                                  | WRF omega formula                                                                                                  |
| Horizontal diffusion                                | Multiscale                                                                                                         |
| Vertical diffusion                                  | ACM2 vertical diffusion scheme (Pleim 2007a, 2007b)                                                                |
| Chemical mechanism and aerosol processing<br>module | SAPRC-07 and AERO6 (Carter, 2010; Simon, 2015)                                                                     |
| Dry deposition model                                | M3Dry (Pleim <i>et al.</i> , 2001)                                                                                 |

**Table S2. The list of the primary PM species included the KORUS-AQ emission inventory, and the corresponding pollutants simulated in CMAQ version 5.2 and measured at the Korean supersites.**

| KORUS-AQ emissions<br>species | Corresponding CMAQ<br>species | Corresponding Korean supersite<br>species                                                                                                                                                                 | Description                                              |
|-------------------------------|-------------------------------|-----------------------------------------------------------------------------------------------------------------------------------------------------------------------------------------------------------|----------------------------------------------------------|
| PSO4                          | ASO4J                         | PM <sub>2.5</sub> SO <sub>4</sub>                                                                                                                                                                         | Fine mode sulfate                                        |
| PNO3                          | ANO3J                         | PM <sub>2.5</sub> NO <sub>3</sub>                                                                                                                                                                         | Fine mode nitrate                                        |
| PCL                           | ACLJ                          | PM <sub>2.5</sub> Cl                                                                                                                                                                                      | Fine mode particulate chloride                           |
| PNH4                          | ANH4J                         | PM <sub>2.5</sub> NH <sub>4</sub>                                                                                                                                                                         | Fine particulate ammonium                                |
| PNA                           | ANAJ                          | PM <sub>2.5</sub> Na                                                                                                                                                                                      | Fine mode sodium                                         |
| PCA                           | ACAJ                          | PM <sub>2.5</sub> Ca                                                                                                                                                                                      | Fine mode calcium                                        |
| PMG                           | AMGJ                          | PM <sub>2.5</sub> Mg                                                                                                                                                                                      | Fine mode magnesium                                      |
| PK                            | AKJ                           | PM <sub>2.5</sub> K                                                                                                                                                                                       | Fine mode potassium                                      |
| POC                           | APOCI, APOCJ                  | PM <sub>2.5</sub> OC                                                                                                                                                                                      | Fine mode primary organic carbon                         |
| PNCOM                         | APNCOMI, APNCOMJ              | -                                                                                                                                                                                                         | Fine mode primary non-carbon<br>organic matter           |
| PEC                           | AECI, AECJ                    | PM <sub>2.5</sub> EC                                                                                                                                                                                      | Fine mode elemental carbon                               |
| PFE                           | AFEJ                          | PM <sub>2.5</sub> Fe                                                                                                                                                                                      | Fine mode iron                                           |
| PAL                           | AALJ                          | -                                                                                                                                                                                                         | Fine mode aluminum                                       |
| PSI                           | ASIJ                          | -                                                                                                                                                                                                         | Fine mode silicon                                        |
| PTI                           | ATIJ                          | PM <sub>2.5</sub> Ti                                                                                                                                                                                      | Fine mode titanium                                       |
| PMN                           | AMNJ                          | PM <sub>2.5</sub> Mn                                                                                                                                                                                      | Fine mode manganese                                      |
| PH2O                          | AH2OJ                         | -                                                                                                                                                                                                         | Fine mode particulate water                              |
| PMOTHR                        | AOTHRJ                        | PM <sub>2.5</sub> V, PM <sub>2.5</sub> Cr, PM <sub>2.5</sub> Ni, PM <sub>2.5</sub> Cu,<br>PM <sub>2.5</sub> Zn, PM <sub>2.5</sub> As, PM <sub>2.5</sub> Se, PM <sub>2.5</sub> Br,<br>PM <sub>2.5</sub> Pb | Remaining unspciated (undefined)<br>fine mode primary PM |
| PMC                           | ACORS                         | -                                                                                                                                                                                                         | Coarse mode primary PM                                   |

**Table S3. Summary statistics between the WRF-simulated hourly meteorological fields (2 m air temperatures (°C), and 10 m wind U and V components (m/s)) and ground-based in-situ measurements in Korea during the study periods 2019 (132 sites) and 2022 (95 sites). R: Pearson’s correlation coefficient, IOA: index of agreement, RMSE: root mean square error, MB: mean bias.**

|      | 2019            |        |        | 2022            |        |        |
|------|-----------------|--------|--------|-----------------|--------|--------|
|      | Air temperature | Wind U | Wind V | Air temperature | Wind U | Wind V |
| R    | 0.98            | 0.64   | 0.52   | 0.95            | 0.65   | 0.48   |
| IOA  | 0.99            | 0.74   | 0.69   | 0.96            | 0.75   | 0.66   |
| RMSE | 2.34            | 1.68   | 1.55   | 2.81            | 1.56   | 1.41   |
| MB   | -1.00           | 0.16   | -0.21  | -1.56           | 0.49   | 0.02   |

20

**Table S4. Seasonal and yearly mean NO<sub>x</sub> emissions (tons/day) before (a priori) and after (a posteriori) the NO<sub>x</sub> emissions adjustment over the modeling domain during the study period 2019. MAM: March, April, and May, JJA: June, July, and August, SON: September, October, and November, DJF: December, January, and February.**

|                               | MAM    | JJA    | SON    | DJF   | Yearly |
|-------------------------------|--------|--------|--------|-------|--------|
| A priori                      | 2.21   | 2.28   | 2.17   | 2.17  | 2.21   |
| A posteriori                  | 4.98   | 6.25   | 4.72   | 3.73  | 4.92   |
| Difference (post - prior) (%) | 125.08 | 174.16 | 117.68 | 71.64 | 122.79 |

**25 Table S5. Summary statistics of the CMAQ-simulated daily mean surface NO<sub>2</sub> concentrations (ppb) before (a priori) and after (a posteriori) the NO<sub>x</sub> emission adjustment and ground-based in-situ measurements (346 sites in Korea and 235 sites in the NCP region) during the study period 2019. R: Pearson’s correlation coefficient; NMB (%): normalized mean bias.**

|        |     | Korea    |              | NCP      |              |
|--------|-----|----------|--------------|----------|--------------|
|        |     | A priori | A posteriori | A priori | A posteriori |
| MAM    | R   | 0.66     | 0.72         | 0.75     | 0.75         |
|        | NMB | -24.20   | -5.66        | -13.90   | 12.34        |
| JJA    | R   | 0.45     | 0.63         | 0.54     | 0.52         |
|        | NMB | 15.63    | 1.83         | 5.25     | 22.32        |
| SON    | R   | 0.72     | 0.82         | 0.50     | 0.55         |
|        | NMB | -2.06    | 21.66        | -11.43   | 15.24        |
| DJF    | R   | 0.75     | 0.76         | 0.55     | 0.59         |
|        | NMB | -23.54   | 13.45        | -1.05    | 33.75        |
| Yearly | R   | 0.71     | 0.84         | 0.76     | 0.78         |

|  |     |        |      |       |       |
|--|-----|--------|------|-------|-------|
|  | NMB | -12.11 | 8.51 | -6.00 | 21.70 |
|--|-----|--------|------|-------|-------|

30 **Table S6. Seasonal and yearly mean primary PM emissions (g/s) before (a priori) and after (a posteriori) the primary PM emissions adjustments (the emissions adjustments using the AHI AOD and GOCI-AHI fused AOD) over the modeling domain during the study period 2019. The primary PM emissions here indicate the total amount of all primary PM species listed in Table S2.**

|                |                               | MAM    | JJA    | SON   | DJF    | Yearly |
|----------------|-------------------------------|--------|--------|-------|--------|--------|
| Emissions      | A priori                      | 13.45  | 11.90  | 12.35 | 15.19  | 13.22  |
| adjusted using | A posteriori                  | 21.19  | 21.61  | 19.55 | 31.79  | 23.53  |
| AHI AOD        | Difference (post - prior) (%) | 57.54  | 81.62  | 58.27 | 109.30 | 76.68  |
| Emissions      | A priori                      | 13.45  | 11.90  | 12.35 | 15.19  | 13.22  |
| adjusted using | A posteriori                  | 28.28  | 28.91  | 23.16 | 33.08  | 28.36  |
| GOCI-AHI AOD   | Difference (post - prior) (%) | 110.30 | 142.96 | 87.54 | 117.73 | 114.63 |

35 **Table S7. Monthly and 3-month mean NO<sub>x</sub> emissions (tons/day) before (a priori) and after (a posteriori) the NO<sub>x</sub> emissions adjustment over the modeling domain during the study period 2022.**

|                               | MAR   | APR    | MAY   | 3-month |
|-------------------------------|-------|--------|-------|---------|
| A priori                      | 0.83  | 0.82   | 0.82  | 0.82    |
| A posteriori                  | 0.80  | 0.71   | 0.76  | 0.76    |
| Difference (post - prior) (%) | -2.83 | -13.40 | -7.33 | -7.84   |

**Table S8. Monthly and 3-month mean primary PM emissions (g/s) before (a priori) and after (a posteriori) the primary PM emissions adjustments (using GEMS-AMI-GOCI-2 fused AOD) over the modeling domain during the study period 2022. The primary PM emissions here indicate the total amount of all primary PM species listed in Table S2.**

|                               | MAR    | APR   | MAY   | 3-month |
|-------------------------------|--------|-------|-------|---------|
| A priori                      | 14.61  | 12.80 | 12.61 | 13.34   |
| A posteriori                  | 10.35  | 13.67 | 12.38 | 12.14   |
| Difference (post - prior) (%) | -29.17 | 6.86  | -1.81 | -9.03   |

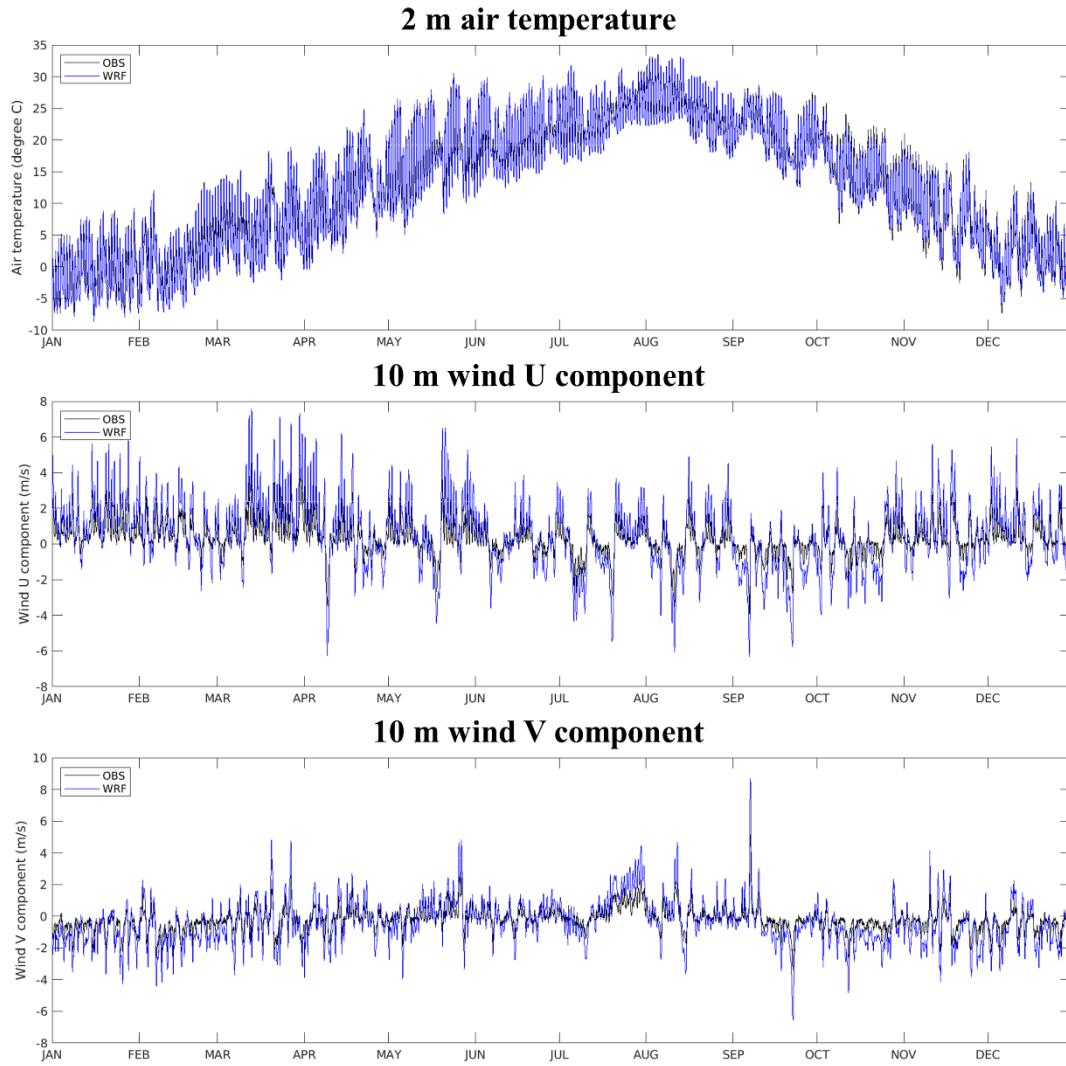

**Figure S1.** Time-series comparisons between WRF-simulated hourly meteorological fields (2 m air temperatures (°C), and 10 m wind U and V components (m/s)) and ground-based in-situ measurements in Korea during the study period 2019 (132 sites). OBS: ground-based in-situ measurements, WRF: WRF-simulated meteorological fields.

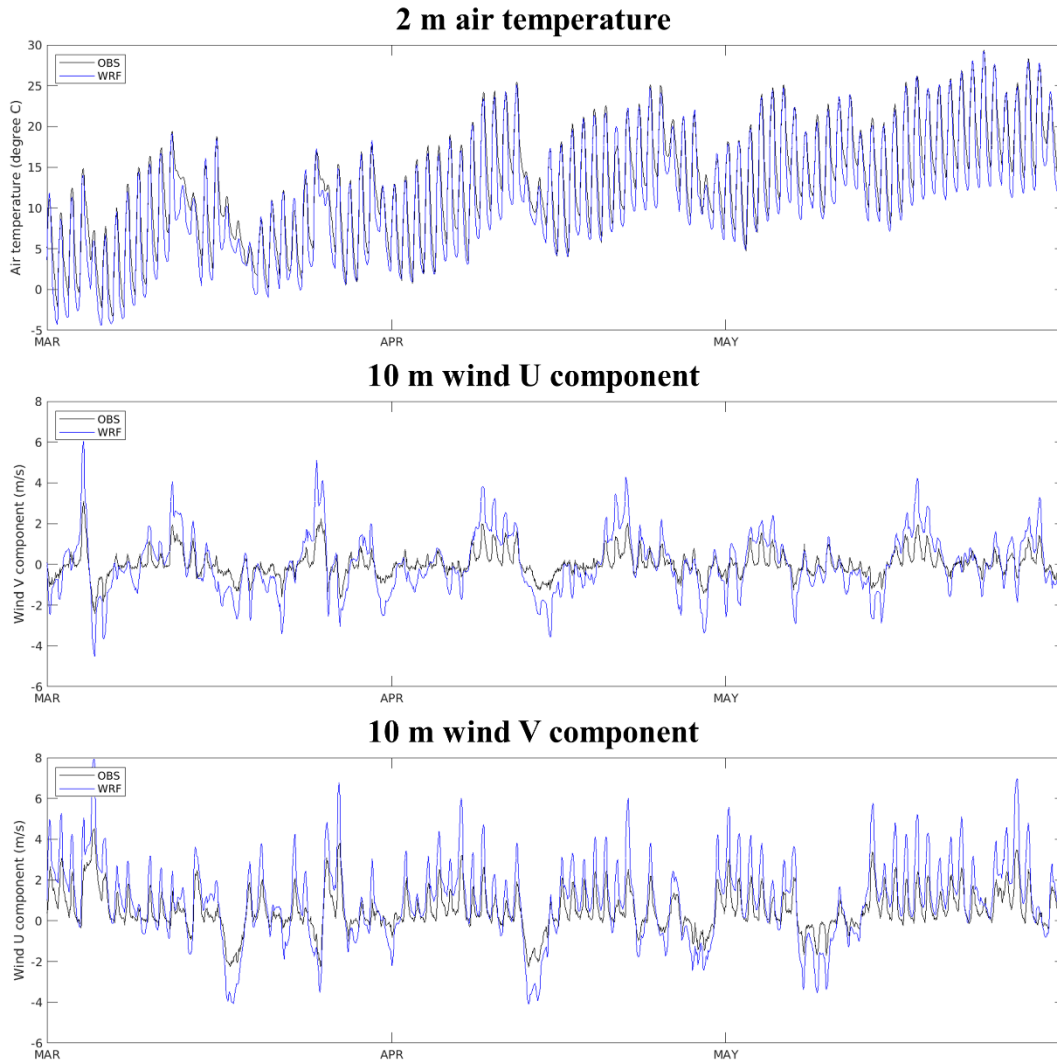

**Figure S2. Time-series comparisons between WRF-simulated hourly meteorological fields (2 m air temperatures (°C), and 10 m wind U and V components (m/s)) and ground-based in-situ measurements in Korea during the study period 2022 (95 sites). OBS: ground-based in-situ measurements, WRF: WRF-simulated meteorological fields.**

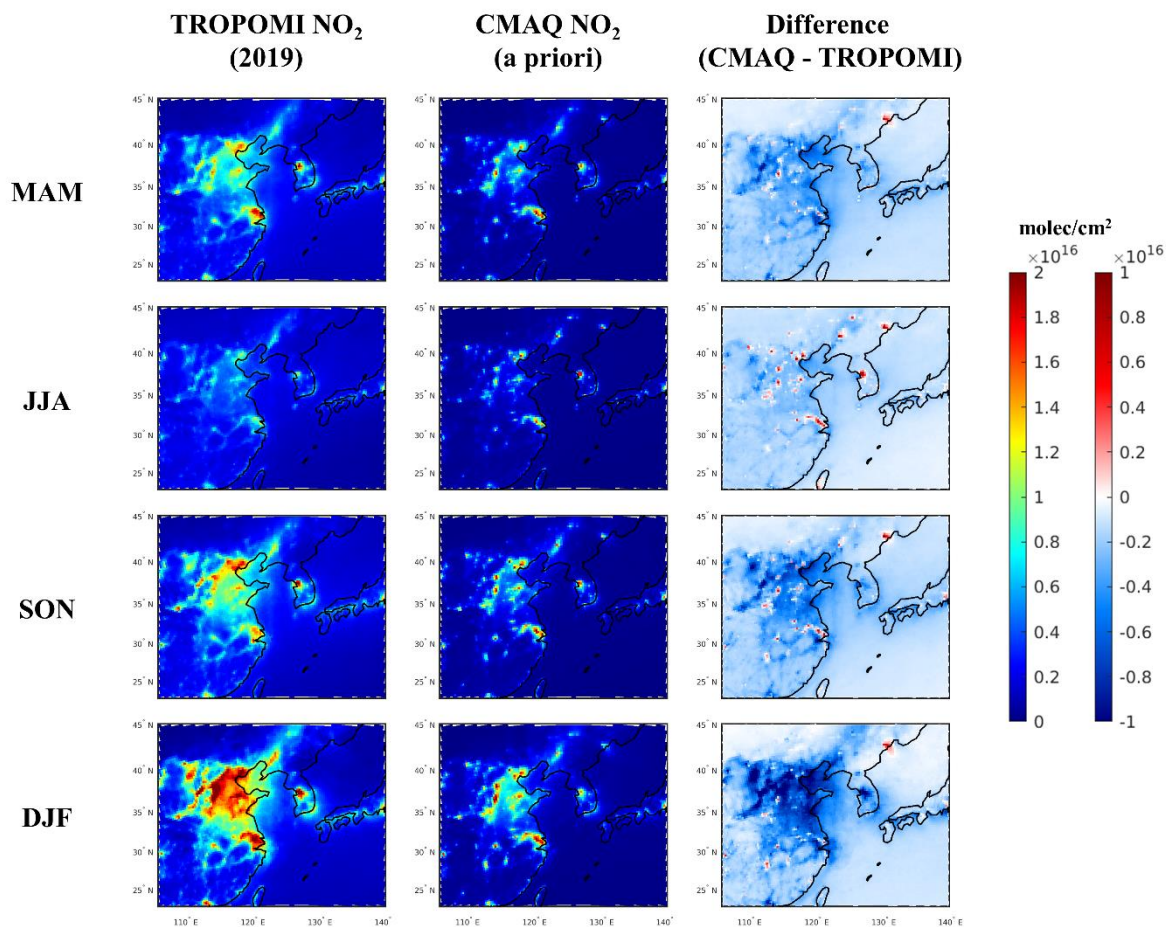

**Figure S3. Spatial distributions of TROPOMI NO<sub>2</sub> columns (molec/cm<sup>2</sup>) and CMAQ-simulated NO<sub>2</sub> columns before the NO<sub>x</sub> emissions adjustment during the study period 2019. MAM: March, April, and May, JJA: June, July, and August, SON: September, October, and November, DJF: December, January, and February**



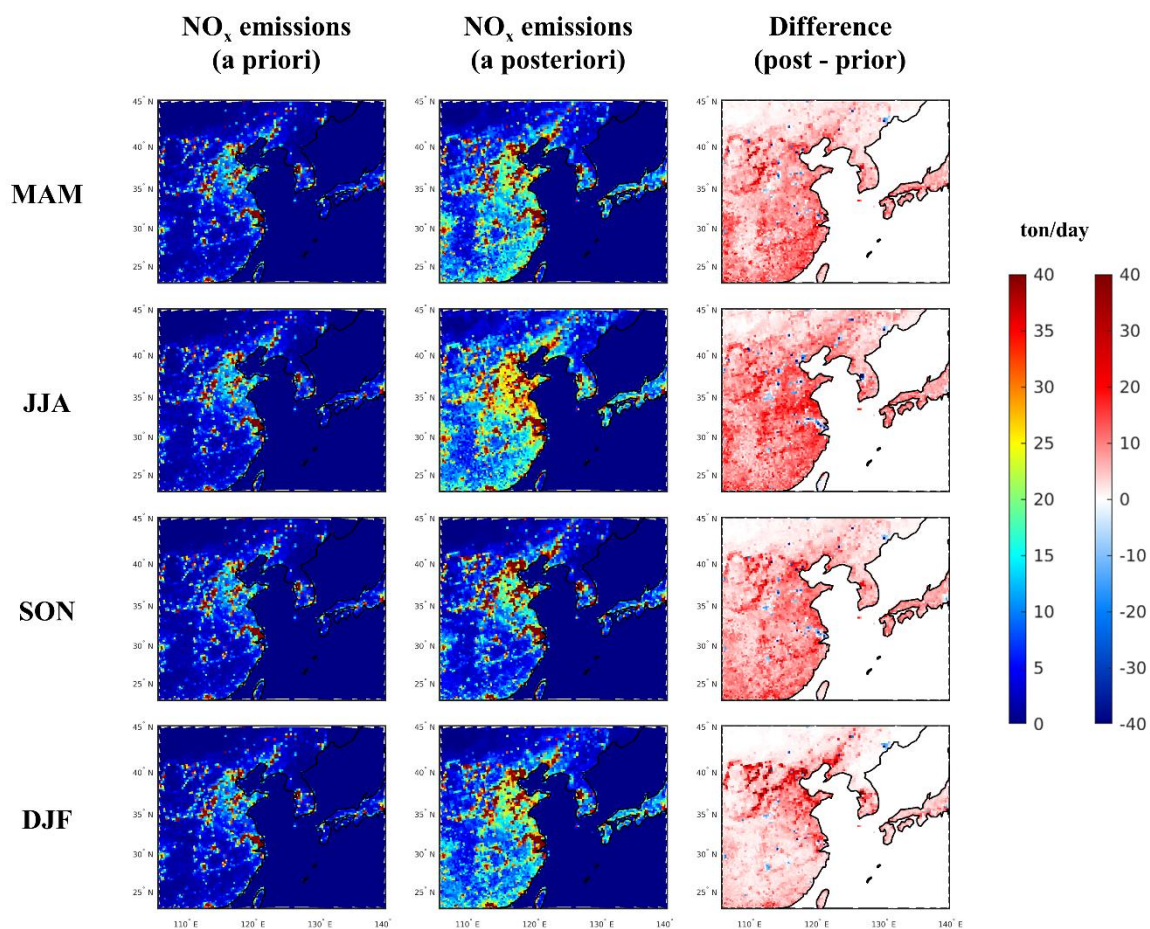

**Figure S4. Spatial distributions of the bottom-up estimates of  $\text{NO}_x$  emissions (ton/day) before (a priori) and after (a posteriori) the  $\text{NO}_x$  emissions adjustment during the study period 2019.**

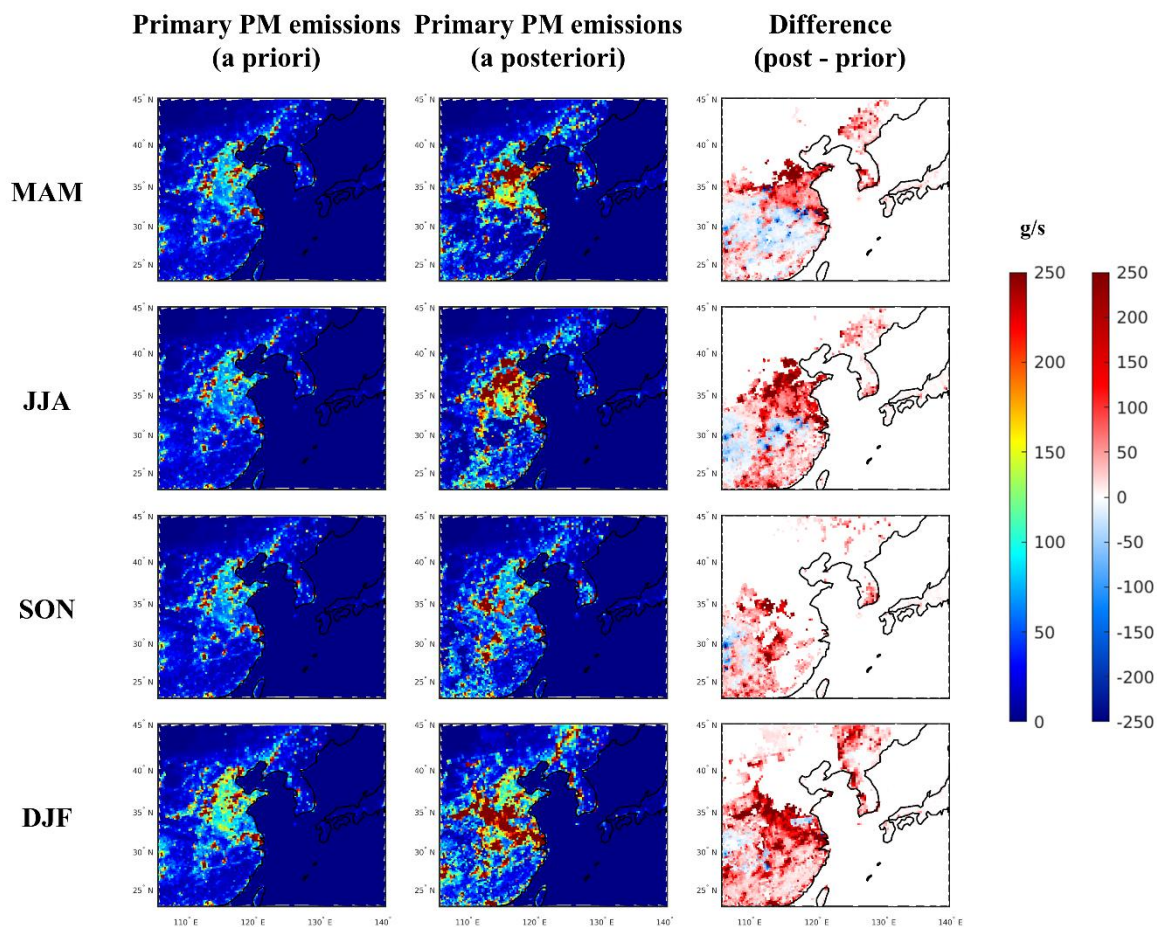

**Figure S5.** Spatial distributions of TROPOMI NO<sub>2</sub> columns, and CMAQ-simulated NO<sub>2</sub> columns before (a priori) and after (a posteriori) the NO<sub>x</sub> emissions adjustment during the study period 2019. MAM: March, April, and May; JJA: June, July, and August; SON: September, October, and November; and DJF: December, January, and February.

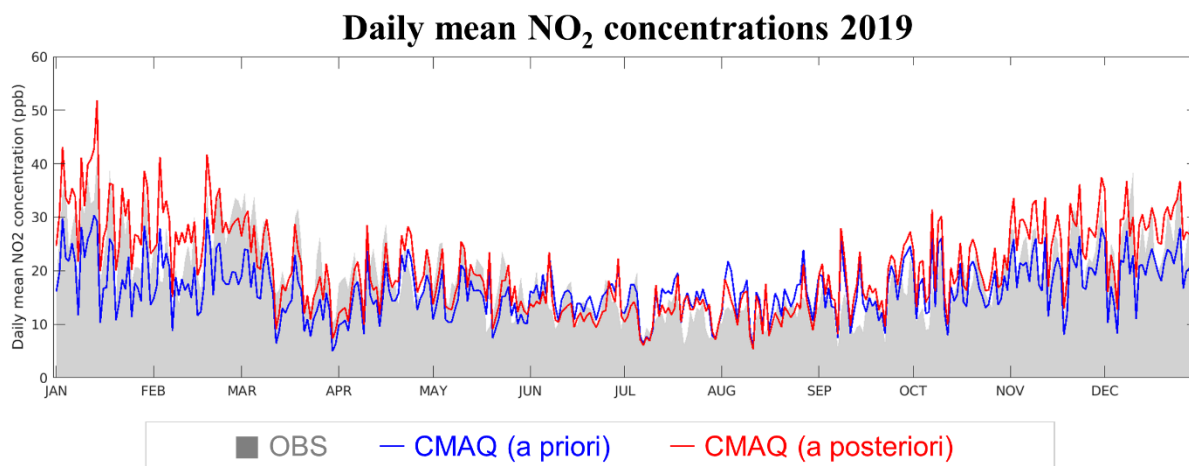

65

**Figure S6.** Comparisons of the time-series of the CMAQ-simulated daily mean surface NO<sub>2</sub> concentrations (ppb) before (a priori) and after (a posteriori) the NO<sub>x</sub> emission adjustment, and the ground-based in-situ measurements in Korea (346 AirKorea sites) during the study period 2019. OBS: ground-based in-situ measurements.

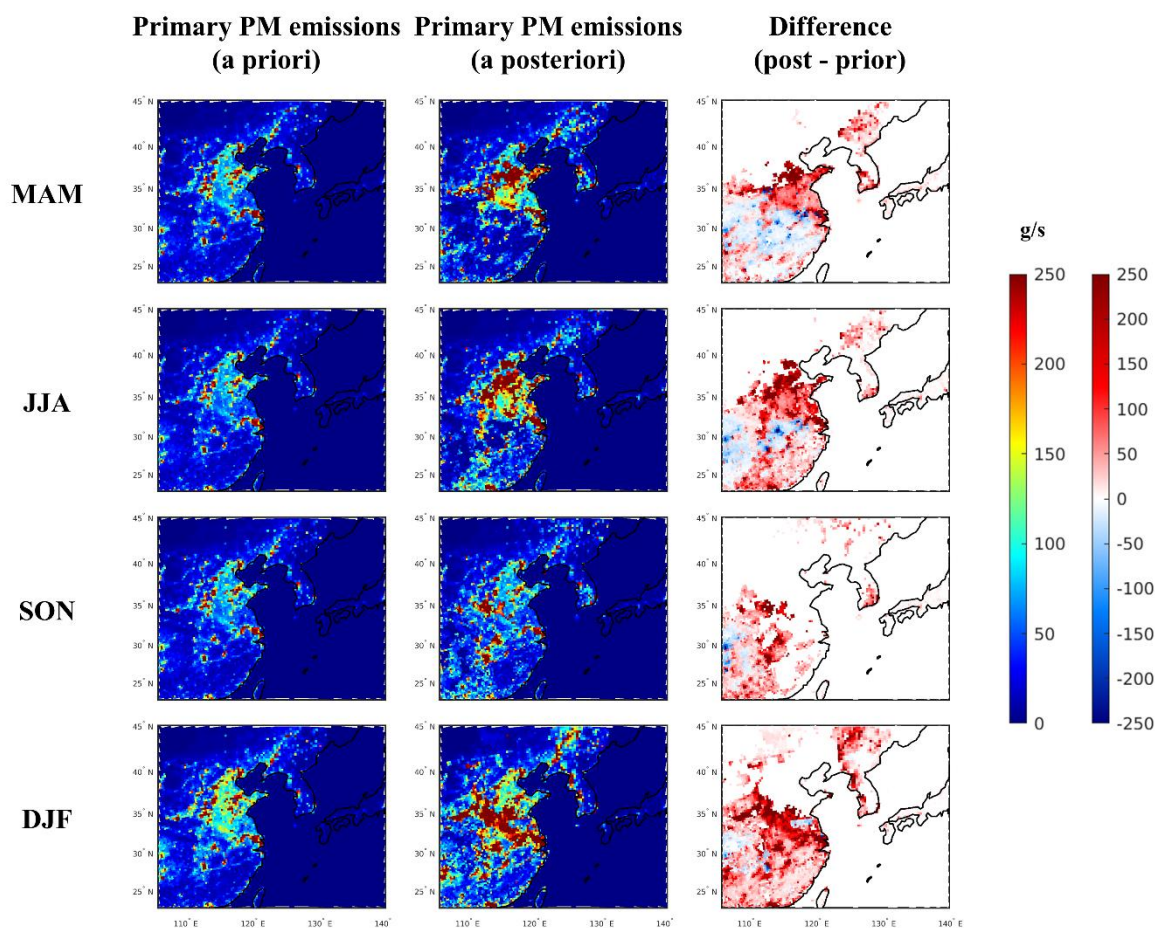

**Figure S7. Spatial distributions of the bottom-up estimates of primary PM emissions (g/s) before (a priori) and after (a posteriori) the primary PM emissions adjustment (using the AHI AOD) during the study period 2019. The primary PM emissions here indicate the total amount of all primary PM species listed in Table S2.**



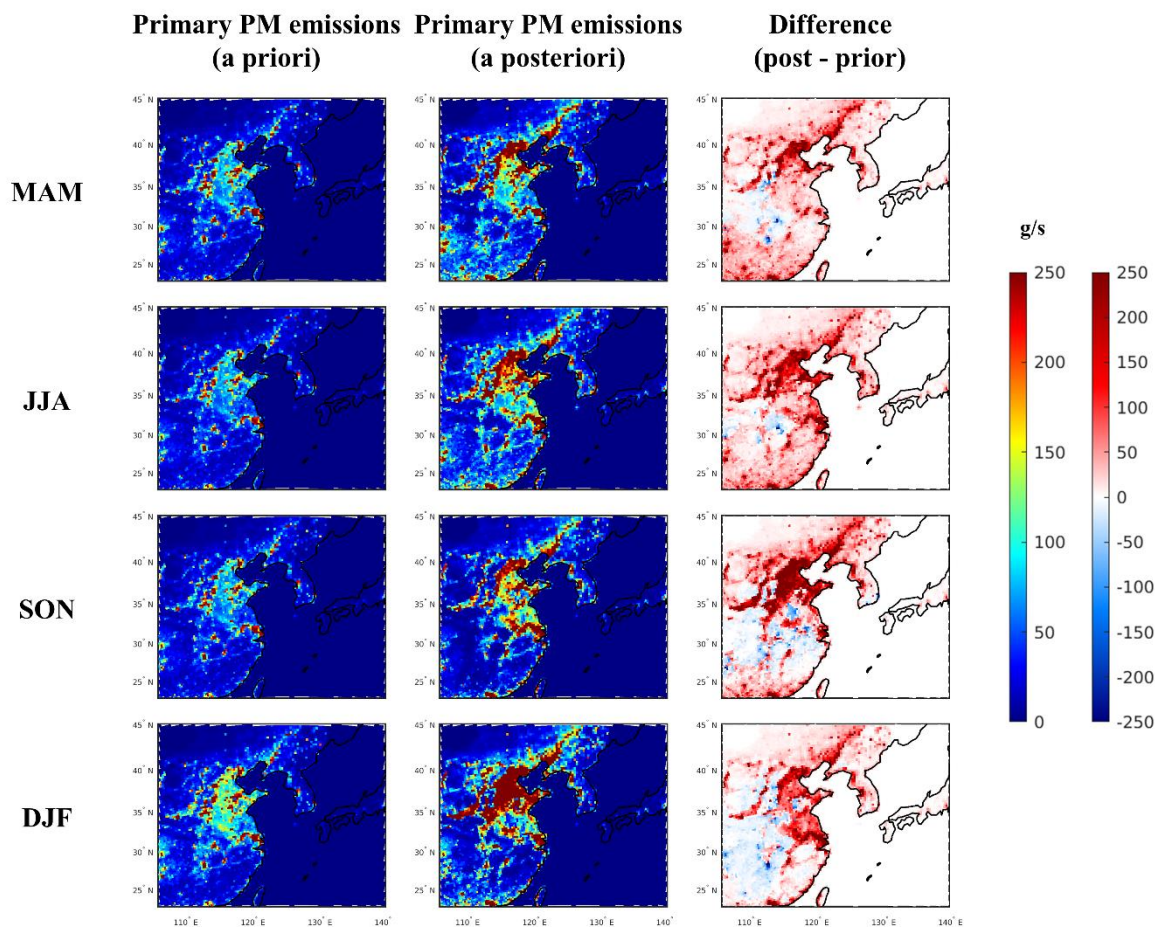

**Figure S8.** Spatial distributions of the bottom-up estimates of primary PM emissions (g/s) before (a priori) and after (a posteriori) the primary PM emissions adjustment (using GOCI-AHI fused AOD) during the study period 2019. The primary PM emissions here indicate the total amount of all primary PM species listed in Table S2.

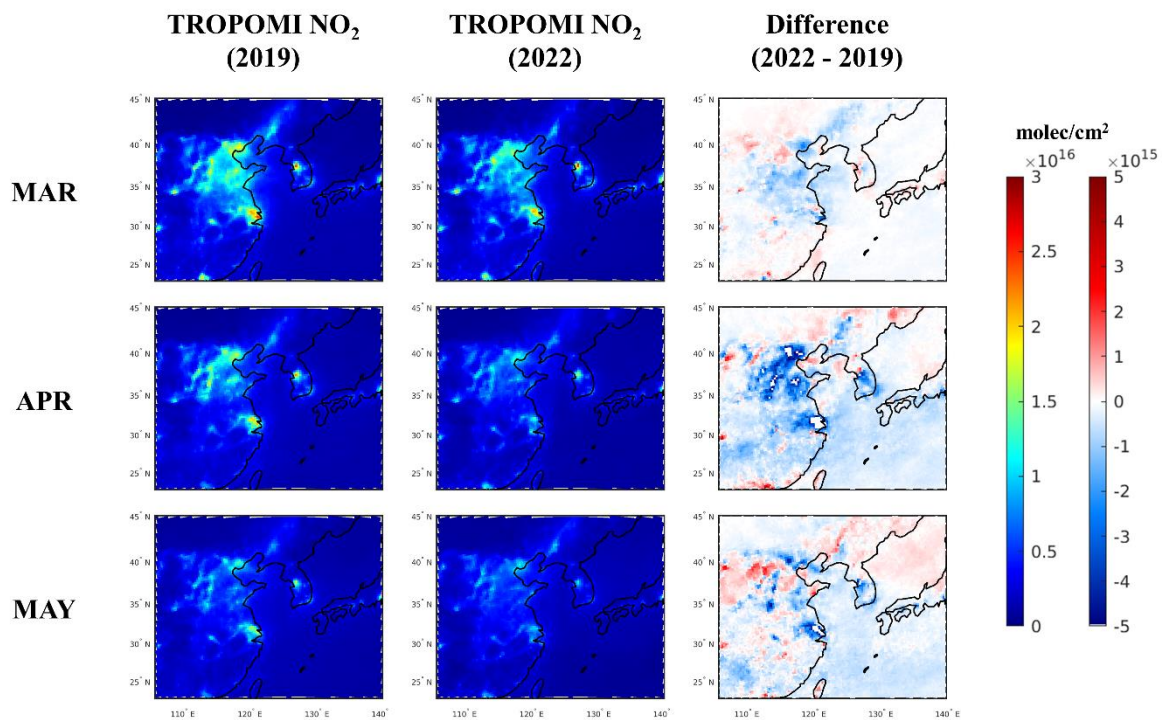

**Figure S9.** Spatial distributions of TROPOMI NO<sub>2</sub> columns (molec/cm<sup>2</sup>) in March, April, and May 2019 and 2022.

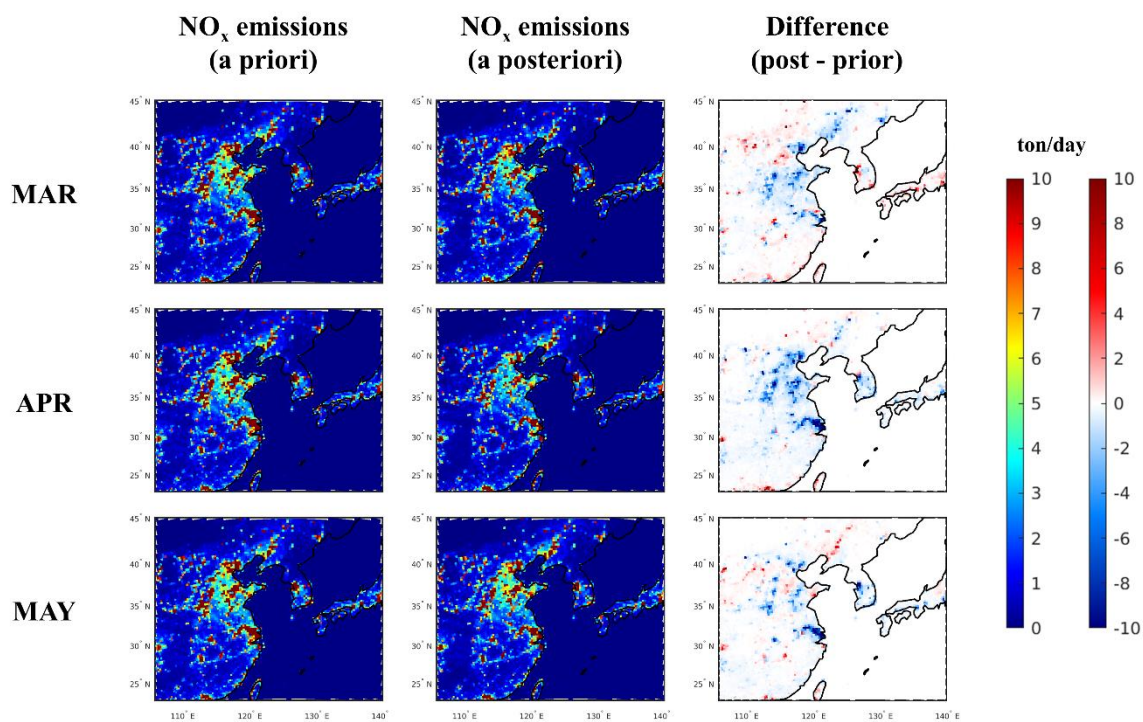

85 **Figure S10. Spatial distributions of the bottom-up estimates of NO<sub>x</sub> emissions (ton/day) before (a priori) and after (a posteriori) the NO<sub>x</sub> emissions adjustment during the study period 2022.**

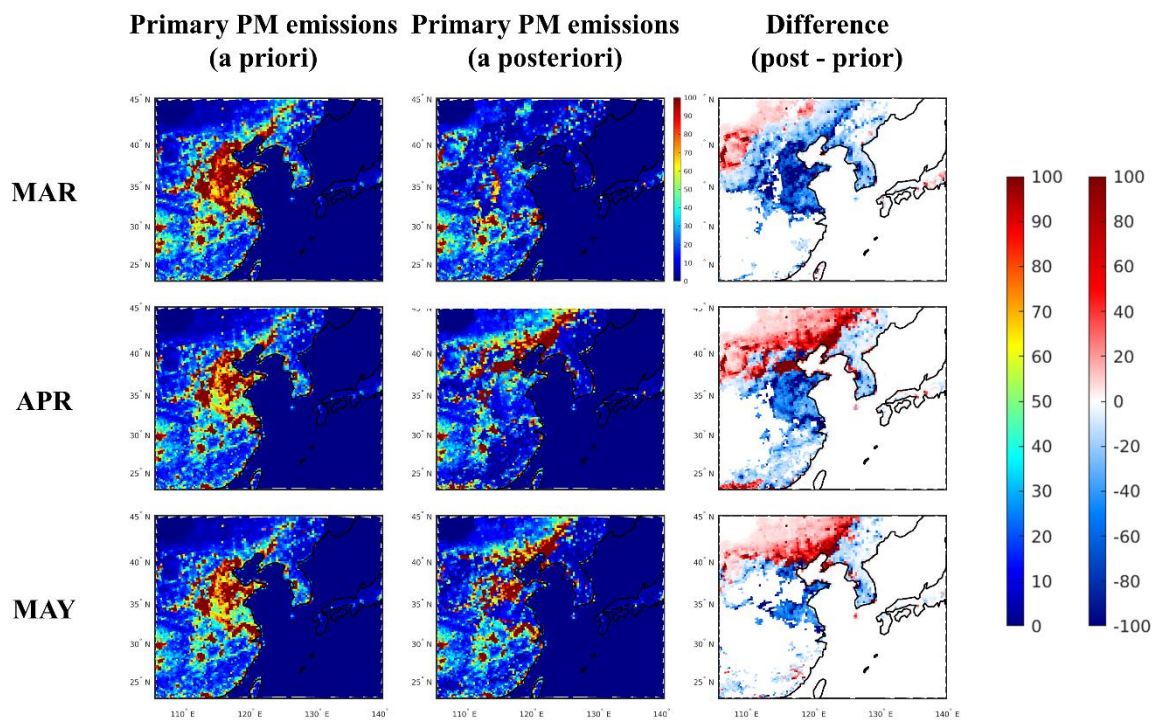

90 **Figure S11.** Spatial distributions of the bottom-up estimates of primary PM emissions (g/s) before (a priori) and after (a posteriori) the primary PM emissions adjustment (using GEMS-AMI-GOCI-2 fused AOD) during the study period 2022. The primary PM emissions here indicate the total amount of all primary PM species listed in Table S2.



## References

- Hatakeyama, S., Murano, K., Sakamaki, F., Mukai, H., Bandow, H., & Komazaki, Y. (2001). Transport of Atmospheric Pollutants from East Asia. *Water, Air, and Soil Pollution*, 130(1), 373–378. <https://doi.org/10.1023/A:1013877000169>
- Ohara, T., Akimoto, H., Kurokawa, J., Horii, N., Yamaji, K., Yan, X., & Hayasaka, T. (2007). An Asian emission inventory of anthropogenic emission sources for the period 1980–2020. *Atmospheric Chemistry and Physics*, 7(16), 4419–4444. <https://doi.org/10.5194/acp-7-4419-2007>
- Kumar, N., Chu, A., & Foster, A. (2007). An empirical relationship between PM<sub>2.5</sub> and aerosol optical depth in Delhi Metropolitan. *Atmospheric Environment*, 41(21), 4492–4503. <https://doi.org/10.1016/j.atmosenv.2007.01.046>
- Tian, J. and Chen, D., 2010. Spectral, spatial, and temporal sensitivity of correlating MODIS aerosol optical depth with ground-based fine particulate matter (PM<sub>2.5</sub>) across southern Ontario. *Canadian Journal of Remote Sensing*, 36, 119–128. [10.5589/m10-033](https://doi.org/10.5589/m10-033).
- Remer, L. A., Mattoo, S., Levy, R. C., & Munchak, L. A. (2013). MODIS 3 km aerosol product: Algorithm and global perspective. *Atmospheric Measurement Techniques*, 6(7), 1829–1844. <https://doi.org/10.5194/amt-6-1829-2013>
- Levy, R. C., Mattoo, S., Munchak, L. A., Remer, L. A., Sayer, A. M., Patadia, F., & Hsu, N. C. (2013). The Collection 6 MODIS aerosol products over land and ocean. *Atmospheric Measurement Techniques*, 6(11), 2989–3034. <https://doi.org/10.5194/amt-6-2989-2013>
- Chan, P. K., Zhao, X.-P., & Heidinger, A. K. (2013). Long-Term Aerosol Climate Data Record Derived from Operational AVHRR Satellite Observations. *Dataset Papers in Geosciences*, 2013, e140791. <https://doi.org/10.7167/2013/140791>
- Ahn, C., Torres, O., & Jethva, H. (2014). Assessment of OMI near-UV aerosol optical depth over land. *Journal of Geophysical Research: Atmospheres*, 119(5), 2457–2473. <https://doi.org/10.1002/2013JD020188>
- Levy, R., Hsu, C., et al., 2015. MODIS Atmosphere L2 Aerosol Product. NASA MODIS Adaptive Processing System, Goddard Space Flight Center, USA: [http://dx.doi.org/10.5067/MODIS/MOD04\\_L2.006](http://dx.doi.org/10.5067/MODIS/MOD04_L2.006)
- Garay, M. J., Witek, M. L., Kahn, R. A., Seidel, F. C., Limbacher, J. A., Bull, M. A., Diner, D. J., Hansen, E. G., Kalashnikova, O. V., Lee, H., Nastan, A. M., & Yu, Y. (2020). Introducing the 4.4 km spatial resolution Multi-Angle Imaging SpectroRadiometer (MISR) aerosol product. *Atmospheric Measurement Techniques*, 13(2), 593–628. <https://doi.org/10.5194/amt-13-593-2020>
- Bellouin, N., Boucher, O., Haywood, J., & Reddy, M. S. (2005). Global estimate of aerosol direct radiative forcing from satellite measurements. *Nature*, 438(7071), 1138–1141. <https://doi.org/10.1038/nature04348>
- Remer, L. A., Kleidman, R. G., Levy, R. C., Kaufman, Y. J., Tanré, D., Mattoo, S., Martins, J. V., Ichoku, C., Koren, I., Yu, H., & Holben, B. N. (2008). Global aerosol climatology from the MODIS satellite sensors. *Journal of Geophysical Research: Atmospheres*, 113(D14). <https://doi.org/10.1029/2007JD009661>
- Munchak, L. A., Levy, R. C., Mattoo, S., Remer, L. A., Holben, B. N., Schafer, J. S., Hostetler, C. A., & Ferrare, R. A. (2013). MODIS 3 km aerosol product: Applications over land in an urban/suburban region. *Atmospheric Measurement Techniques*, 6(7), 1747–1759. <https://doi.org/10.5194/amt-6-1747-2013>

- Filonchyk, M., Yan, H., Zhang, Z., Yang, S., Li, W., & Li, Y. (2019). Combined use of satellite and surface observations to study aerosol optical depth in different regions of China. *Scientific Reports*, 9(1), 6174. <https://doi.org/10.1038/s41598-019-42466-6>
- 130 Jung, J., Souri, A. H., Wong, D. C., Lee, S., Jeon, W., Kim, J., & Choi, Y. (2019). The Impact of the Direct Effect of Aerosols on Meteorology and Air Quality Using Aerosol Optical Depth Assimilation During the KORUS-AQ Campaign. *Journal of Geophysical Research: Atmospheres*, 124(14), 8303–8319. <https://doi.org/10.1029/2019JD030641>
- 135 Jung, J., Choi, Y., Wong, D. C., Nelson, D., & Lee, S. (2021). Role of Sea Fog Over the Yellow Sea on Air Quality With the Direct Effect of Aerosols. *Journal of Geophysical Research: Atmospheres*, 126(5), e2020JD033498. <https://doi.org/10.1029/2020JD033498>
- Lee, K., Kim, M., Choi, M., Kim, K., Choi, Y., Jeong, J., Moon, K.-J., & Lee, S. (2022). Fast and operational gap filling in satellite-derived aerosol optical depths using statistical techniques. *J. Appl. Rem. Sens*, 16(4). <https://doi.org/10.1117/1.JRS.16.044507>
- 140 Byun, D., & Schere, K. L. (2006). Review of the Governing Equations, Computational Algorithms, and Other Components of the Models-3 Community Multiscale Air Quality (CMAQ) Modeling System. *Applied Mechanics Reviews*, 59(2), 51–77. <https://doi.org/10.1115/1.2128636>
- Wang, J., Xu, X., Henze, D. K., Zeng, J., Ji, Q., Tsay, S.-C., & Huang, J. (2012). Top-down estimate of dust emissions through integration of MODIS and MISR aerosol retrievals with the GEOS-Chem adjoint model. *Geophysical Research Letters*, 39(8). <https://doi.org/10.1029/2012GL051136>
- 145 Ku, B., & Park, R. J. (2013). Comparative inverse analysis of satellite (MODIS) and ground (PM10) observations to estimate dust emissions in East Asia. *Asia-Pacific Journal of Atmospheric Sciences*, 49(1), 3–17. <https://doi.org/10.1007/s13143-013-0002-5>
- Koo, Y.-S., Choi, D.-R., Kwon, H.-Y., Jang, Y.-K., & Han, J.-S. (2015). Improvement of PM10 prediction in East Asia using inverse modeling. *Atmospheric Environment*, 106, 318–328. <https://doi.org/10.1016/j.atmosenv.2015.02.004>
- 150 Pang, J., Liu, Z., Wang, X., Bresch, J., Ban, J., Chen, D., & Kim, J. (2018). Assimilating AOD retrievals from GOCI and VIIRS to forecast surface PM2.5 episodes over Eastern China. *Atmospheric Environment*, 179, 288–304. <https://doi.org/10.1016/j.atmosenv.2018.02.011>
- Xia, X., Min, J., Shen, F., Wang, Y., & Yang, C. (2019). Aerosol Data Assimilation Using Data from Fengyun-3A and MODIS: Application to a Dust Storm over East Asia in 2011. *Advances in Atmospheric Sciences*, 36(1), 1–14. <https://doi.org/10.1007/s00376-018-8075-9>
- 155 Wang, Y., Wang, J., Xu, X., Henze, D. K., Qu, Z., & Yang, K. (2020). Inverse modeling of SO2 and NOx emissions over China using multisensor satellite data – Part 1: Formulation and sensitivity analysis. *Atmospheric Chemistry and Physics*, 20(11), 6631–6650. <https://doi.org/10.5194/acp-20-6631-2020>

- 160 Li, N., Tang, K., Wang, Y., Wang, J., Feng, W., Zhang, H., Liao, H., Hu, J., Long, X., Shi, C., & Su, X. (2021). Is the efficacy of satellite-based inversion of SO<sub>2</sub> emission model dependent? *Environmental Research Letters*, 16(3), 035018. <https://doi.org/10.1088/1748-9326/abe829>
- Lee, S., Song, C. H., Han, K. M., Henze, D. K., Lee, K., Yu, J., Woo, J.-H., Jung, J., Choi, Y., Saide, P. E., & Carmichael, G. R. (2022). Impacts of uncertainties in emissions on aerosol data assimilation and short-term PM<sub>2.5</sub> predictions over  
165 Northeast Asia. *Atmospheric Environment*, 271, 118921. <https://doi.org/10.1016/j.atmosenv.2021.118921>
- Vijayaraghavan, K., Snell, H. E., & Seigneur, C. (2008). Practical Aspects of Using Satellite Data in Air Quality Modeling. *Environmental Science & Technology*, 42(22), 8187–8192. <https://doi.org/10.1021/es7031339>
- Jeon, W., Choi, Y., Percell, P., Sourì, A. H., Song, C.-K., Kim, S.-T., & Kim, J. (2016). Computationally efficient air quality forecasting tool: Implementation of STOPS v1.5 model into CMAQ v5.0.2 for a prediction of Asian dust. *Geoscientific  
170 Model Development*, 9(10), 3671–3684. <https://doi.org/10.5194/gmd-9-3671-2016>
- Lee, S., Song, C. H., Park, R. S., Park, M. E., Han, K. M., Kim, J., et al. (2016). GIST-PM-Asia v1: Development of a numerical system to improve particulate matter forecasts in South Korea using geostationary satellite-retrieved aerosol optical data over Northeast Asia. *Geoscientific Model Development*, 9(1), 17–39. <https://doi.org/10.5194/gmd-9-17-2016>
- 175 Yumimoto, K., Nagao, T. m., Kikuchi, M., Sekiyama, T. t, Murakami, H., Tanaka, T. y., Ogi, A., Irie, H., Khatri, P., Okumura, H., Arai, K., Morino, I., Uchino, O., & Maki, T. (2016). Aerosol data assimilation using data from Himawari-8, a next-generation geostationary meteorological satellite. *Geophysical Research Letters*, 43(11), 5886–5894. <https://doi.org/10.1002/2016GL069298>
- Jin, J., Segers, A., Heemink, A., Yoshida, M., Han, W., & Lin, H.-X. (2019). Dust Emission Inversion Using Himawari-8  
180 AODs Over East Asia: An Extreme Dust Event in May 2017. *Journal of Advances in Modeling Earth Systems*, 11(2), 446–467. <https://doi.org/10.1029/2018MS001491>
- Choi, W. J., and Coauthors, 2018: Introducing the Geostationary Environment Monitoring Spectrometer. *J. Appl. Remote Sens.*, 13, 044005, <https://doi.org/10.1117/1.JRS.12.044005>
- Kim, J., Choi, M., Kim, M., Lim, H., Lee, S., Moon, K. J., Choi, W. J., Yoon, J. M., Kim, S.-K., Ko, D. H., Lee, S. H., Park,  
185 Y., & Chung, C.-Y. (2018). Monitoring Atmospheric Composition by Geo-Kompsat-2: Goci-2, Ami and Gems. IGARSS 2018 - 2018 IEEE International Geoscience and Remote Sensing Symposium, 7750–7752. <https://doi.org/10.1109/IGARSS.2018.8518713>
- Kim, J., Jeong, U., Ahn, M.-H., Kim, J. H., Park, R. J., Lee, H., Song, C. H., Choi, Y.-S., Lee, K.-H., Yoo, J.-M., Jeong, M.-J., Park, S. K., Lee, K.-M., Song, C.-K., Kim, S.-W., Kim, Y. J., Kim, S.-W., Kim, M., Go, S., ... Choi, Y. (2020a).  
190 New Era of Air Quality Monitoring from Space: Geostationary Environment Monitoring Spectrometer (GEMS). *Bulletin of the American Meteorological Society*, 101(1), E1–E22. <https://doi.org/10.1175/BAMS-D-18-0013.1>
- Zoogman, P., and Coauthors, 2011: Ozone air quality measurement requirements for a geostationary satellite mission. *Atmos. Environ.*, 45, 7143–7150, <https://doi.org/10.1016/j.atmosenv.2011.05.058>

- Ingmann, P., B. Veihelmann, J. Langen, D. Lamarre, H. Stark, and G. B. Courrèges-Lacoste, 2012: Requirements for the  
 195 GMES atmosphere service and ESA's implementation concept: Sentinels-4/-5 and -5p. *Remote Sens. Environ.*, 120,  
 58–69, <https://doi.org/10.1016/j.rse.2012.01.023>
- Zou, B., Liu, N., Wang, W., Feng, H., Liu, X., & Lin, Y. (2020). An Effective and Efficient Enhanced Fixed Rank  
 Smoothing Method for the Spatiotemporal Fusion of Multiple-Satellite Aerosol Optical Depth Products. *Remote  
 Sensing*, 12(7), Article 7. <https://doi.org/10.3390/rs12071102>
- 200 Choi, M., Lim, H., Kim, J., Lee, S., Eck, T. F., Holben, B. N., Garay, M. J., Hyer, E. J., Saide, P. E., & Liu, H. (2019).  
 Validation, comparison, and integration of GOCI, AHI, MODIS, MISR, and VIIRS aerosol optical depth over East  
 Asia during the 2016 KORUS-AQ campaign. *Atmospheric Measurement Techniques*, 12(8), 4619–4641.  
<https://doi.org/10.5194/amt-12-4619-2019>
- Go, S., Kim, J., Park, S. S., Kim, M., Lim, H., Kim, J.-Y., Lee, D.-W., & Im, J. (2020). Synergistic Use of Hyperspectral  
 205 UV-Visible OMI and Broadband Meteorological Imager MODIS Data for a Merged Aerosol Product. *Remote Sensing*,  
 12(23), Article 23. <https://doi.org/10.3390/rs12233987>
- Lim, H., Go, S., Kim, J., Choi, M., Lee, S., Song, C.-K., & Kasai, Y. (2021). Integration of GOCI and AHI Yonsei aerosol  
 optical depth products during the 2016 KORUS-AQ and 2018 EMERGE campaigns, *Atmospheric Measurement  
 Techniques*, 14, 4575–4592
- 210 Holben, B. N., Eck, T. F., Slutsker, I., Tanré, D., Buis, J. P., Setzer, A., Vermote, E., Reagan, J. A., Kaufmann, Y. J.,  
 Nakajima, T., Lavenu, F., Jankowiak, I., and Smirnov, A. (1998). AERONET: A federated instrument network and data  
 archive for aerosol characterisation, *Remote Sens. Environ.*, 66, 1–16
- Dyer, O. (2022). Covid-19: Lockdowns spread in China as omicron tests “zero covid” strategy. *BMJ*, 376, o859.  
<https://doi.org/10.1136/bmj.o859>
- 215 Woo, J.-H., Kim, Y., Kim, H.-K., Choi, K.-C., Eum, J.-H., Lee, J.-B., Lim, J.-H., Kim, J., & Seong, M. (2020). Development  
 of the CREATE Inventory in Support of Integrated Climate and Air Quality Modeling for Asia. *Sustainability*, 12(19),  
 7930. <https://doi.org/10.3390/su12197930>
- Jang, Y., Lee, Y., Kim, J., Kim, Y., Woo, J.-H. (2019). Improvement China Point Source for Improving Bottom-Up  
 Emission Inventory. *Asia Pac. J. Atmos. Sci.*, 56, 107–118
- 220 Yeo, S.Y., Lee, H.K., Choi, S.W, Seol, S.H., Jin, H.A., Yoo, C., Lim, J.Y., Kim, J.S. (2019). Analysis of the national air  
 pollutant emission inventory (CAPSS 2015) and the major cause of change in Republic of Korea. *Asian J. Atmos.  
 Environ.* 13 (3), 212–231. <https://doi.org/10.5572/ajae.2019.13.3.212>
- Toon, O. B., et al. (2016), Planning, implementation and scientific goals of the Studies of Emissions and Atmospheric  
 Composition, Clouds and Climate Coupling by Regional Surveys (SEAC4RS) field mission, *J. Geophys. Res. Atmos.*,  
 225 121, 4967–5009, doi:10.1002/2015JD024297
- Guenther, A. B., Jiang, X., Heald, C. L., Sakulyanontvittaya, T., Duhl, T., Emmons, L. K., & Wang, X. (2012). The Model  
 of Emissions of Gases and Aerosols from Nature version 2.1 (MEGAN2.1): An extended and updated framework for

- modeling biogenic emissions. *Geoscientific Model Development*, 5(6), 1471–1492. <https://doi.org/10.5194/gmd-5-1471-2012>
- 230 Guenther, A.B., Karl, T., Harley, P., Wiedinmyer, C., Palmer, P. I., & Geron, C. (2006). Estimates of global terrestrial isoprene emissions using MEGAN (Model of Emissions of Gases and Aerosols from Nature). *Atmospheric Chemistry and Physics*, 6(11), 3181–3210. <https://doi.org/10.5194/acp-6-3181-2006>
- Guenther, A., Jiang, X., Shah, T., Huang, L., Kembball-Cook, S., & Yarwood, G. (2020). Model of Emissions of Gases and Aerosol from Nature Version 3 (MEGAN3) for Estimating Biogenic Emissions. In C. Mensink, W. Gong, & A. Hakami (Eds.), *Air Pollution Modeling and its Application XXVI* (pp. 187–192). Springer International Publishing. [https://doi.org/10.1007/978-3-030-22055-6\\_29](https://doi.org/10.1007/978-3-030-22055-6_29)
- 235 Yuan, H., Dai, Y., Xiao, Z., Ji, D., & Shangguan, W. (2011). Reprocessing the MODIS Leaf Area Index products for land surface and climate modelling. *Remote Sensing of Environment*, 115(5), 1171–1187. <https://doi.org/10.1016/j.rse.2011.01.001>
- 240 Jiang, Z., Vargas, M., & Csiszar, I. (2016). New operational real-time daily rolling weekly Green Vegetation fraction product derived from suomi NPP VIIRS reflectance data. 2016 IEEE International Geoscience and Remote Sensing Symposium (IGARSS), 3524–3527. <https://doi.org/10.1109/IGARSS.2016.7729911>
- Skamarock, W. C., Klemp, J. B., Dudhia, J., Gill, D. O., Barker, D., Duda, M. G., ... Powers, J. G. (2008). A Description of the Advanced Research WRF Version 3 (No. NCAR/TN-475+STR). University Corporation for Atmospheric Research. <https://doi.org/10.5065/D68S4MVH>
- 245 Pouyaei, A., Choi, Y., Jung, J., Sadeghi, B., & Song, C. H. (2020). Concentration Trajectory Route of Air pollution with an Integrated Lagrangian model (C-TRAIL Model v1.0) derived from the Community Multiscale Air Quality Model (CMAQ Model v5.2). *Geoscientific Model Development*, 13(8), 3489–3505. <https://doi.org/10.5194/gmd-13-3489-2020>
- Pouyaei, A., Sadeghi, B., Choi, Y., Jung, J., Souri, A. H., Zhao, C., & Song, C. H. (2021). Development and Implementation of a Physics-Based Convective Mixing Scheme in the Community Multiscale Air Quality Modeling Framework. *Journal of Advances in Modeling Earth Systems*, 13(6), e2021MS002475. <https://doi.org/10.1029/2021MS002475>
- 250 Park, J., Jung, J., Choi, Y., Mousavinezhad, S., & Pouyaei, A. (2022). The sensitivities of ozone and PM2.5 concentrations to the satellite-derived leaf area index over East Asia and its neighboring seas in the WRF-CMAQ modeling system. *Environmental Pollution*, 306, 119419. <https://doi.org/10.1016/j.envpol.2022.119419>
- 255 Veefkind, J. P., Aben, I., McMullan, K., Förster, H., de Vries, J., Otter, G., Claas, J., Eskes, H. J., de Haan, J. F., Kleipool, Q., van Weele, M., Hasekamp, O., Hoogeveen, R., Landgraf, J., Snel, R., Tol, P., Ingmann, P., Voors, R., Kruizinga, B., ... Levelt, P. F. (2012). TROPOMI on the ESA Sentinel-5 Precursor: A GMES mission for global observations of the atmospheric composition for climate, air quality and ozone layer applications. *Remote Sensing of Environment*, 120, 70–83. <https://doi.org/10.1016/j.rse.2011.09.02>

- 260 Okuyama, A., Andou, A., Date, K., Hoasaka, K., Mori, N., Murata, H., Tabata, T., Takahashi, M., Yoshino, R., & Bessho, K. (2015). Preliminary validation of Himawari-8/AHI navigation and calibration. *Earth Observing Systems*, 9607, 663–672. <https://doi.org/10.1117/12.2188978>
- Bessho, K., Date, K., Hayashi, M., Ikeda, A., Imai, T., Inoue, H., Kumagai, Y., Miyakawa, T., Murata, H., Ohno, T., Okuyama, A., Oyama, R., Sasaki, Y., Shimazu, Y., Shimoji, K., Sumida, Y., Suzuki, M., Taniguchi, H., Tsuchiyama, H., ... Yoshida, R. (2016). An Introduction to Himawari-8/9—Japan’s New-Generation Geostationary Meteorological Satellites. *Journal of the Meteorological Society of Japan*. Ser. II, 94(2), 151–183. <https://doi.org/10.2151/jmsj.2016-009>
- 265 H., ... Yoshida, R. (2016). An Introduction to Himawari-8/9—Japan’s New-Generation Geostationary Meteorological Satellites. *Journal of the Meteorological Society of Japan*. Ser. II, 94(2), 151–183. <https://doi.org/10.2151/jmsj.2016-009>
- Pitchford, M., Maim, W., Schichtel, B., Kumar, N., Lowenthal, D., & Hand, J. (2007). Revised algorithm for estimating light extinction from IMPROVE particle speciation data. *Journal of the Air & Waste Management Association* 57(11), 1326–1336. <https://doi.org/10.3155/1047-3289.57.11.1326>
- 270 1326–1336. <https://doi.org/10.3155/1047-3289.57.11.1326>
- Ångström, A. (1961). Techniques of Determining the Turbidity of the Atmosphere. *Tellus*, 13(2), 214–223. <https://doi.org/10.3402/tellusa.v13i2.9493>
- Choi, M., Kim, J., Lee, J., Kim, M., Park, Y.-J., Jeong, U., Kim, W., Hong, H., Holben, B., Eck, T. F., Song, C. H., Lim, J.-H., & Song, C.-K. (2016). GOCI Yonsei Aerosol Retrieval (YAER) algorithm and validation during the DRAGON-NE Asia 2012 campaign. *Atmospheric Measurement Techniques*, 9(3), 1377–1398. <https://doi.org/10.5194/amt-9-1377-2016>
- 275 Asia 2012 campaign. *Atmospheric Measurement Techniques*, 9(3), 1377–1398. <https://doi.org/10.5194/amt-9-1377-2016>
- Choi, M., Kim, J., Lee, J., Kim, M., Park, Y.-J., Holben, B., Eck, T. F., Li, Z., & Song, C. H. (2018). GOCI Yonsei aerosol retrieval version 2 products: An improved algorithm and error analysis with uncertainty estimation from 5-year validation over East Asia. *Atmospheric Measurement Techniques*, 11(1), 385–408. <https://doi.org/10.5194/amt-11-385-2018>
- 280 2018
- Lim, H., Choi, M., Kim, J., Kasai, Y., & Chan, P. W. (2018). AHI/Himawari-8 Yonsei Aerosol Retrieval (YAER): Algorithm, Validation and Merged Products. *Remote Sensing*, 10(5), 699. <https://doi.org/10.3390/rs10050699>
- Chung, S.-R., Ahn, M.-H., Han, K.-S., Lee, K.-T., & Shin, D.-B. (2020). Meteorological Products of Geo-KOMPSAT 2A (GK2A) Satellite. *Asia-Pacific Journal of Atmospheric Sciences*, 56(2), 185–185. <https://doi.org/10.1007/s13143-020-00199-x>
- 285 00199-x
- Kim, D., Gu, M., Oh, T.-H., Kim, E.-K., & Yang, H.-J. (2021). Introduction of the Advanced Meteorological Imager of Geo-Kompsat-2a: In-Orbit Tests and Performance Validation. *Remote Sensing*, 13(7), Article 7. <https://doi.org/10.3390/rs13071303>
- Kim, M., Kim, J., Lim, H., & Chan, P. W. (2020b). The implementation of Yonsei Aerosol Retrieval (YAER) Algorithm to GK-2A/AMI and FY-4A/AGRI. American Geophysical Union, Fall Meeting 2020, A141-0007.
- 290 GK-2A/AMI and FY-4A/AGRI. American Geophysical Union, Fall Meeting 2020, A141-0007.
- Rodgers, C.D. (2000). Inverse Methods for Atmospheric Sounding: Theory and Practice, Series on Atmospheric, Oceanic and Planetary Physics. WORLD SCIENTIFIC. <https://doi.org/10.1142/3171>

- Souri, A. H., Nowlan, C. R., González Abad, G., Zhu, L., Blake, D. R., Fried, A., Weinheimer, A. J., Wisthaler, A., Woo, J.-H., Zhang, Q., Chan Miller, C. E., Liu, X., & Chance, K. (2020). An inversion of NO<sub>x</sub> and non-methane volatile organic compound (NMVOC) emissions using satellite observations during the KORUS-AQ campaign and implications for surface ozone over East Asia. *Atmospheric Chemistry and Physics*, 20(16), 9837–9854. <https://doi.org/10.5194/acp-20-9837-2020>
- Jung, J., Choi, Y., Souri, A. H., Mousavinezhad, S., Sayeed, A., & Lee, K. (2022). The Impact of Springtime-Transported Air Pollutants on Local Air Quality With Satellite-Constrained NO<sub>x</sub> Emission Adjustments Over East Asia. *Journal of Geophysical Research: Atmospheres*, 127(5), e2021JD035251. <https://doi.org/10.1029/2021JD035251>
- Napelenok, S. L., Cohan, D. S., Hu, Y., & Russell, A. G. (2006). Decoupled direct 3D sensitivity analysis for particulate matter (DDM-3D/PM). *Atmospheric Environment*, 40(32), 6112–6121. <https://doi.org/10.1016/j.atmosenv.2006.05.039>
- Zhang, W., Xu, H., & Zheng, F. (2018). Aerosol Optical Depth Retrieval over East Asia Using Himawari-8/AHI Data. *Remote Sensing*, 10(1), 137. <https://doi.org/10.3390/rs10010137>
- Martin, R. V., Jacob, D. J., Chance, K., Kurosu, T. P., Palmer, P. I., & Evans, M. J. (2003). Global inventory of nitrogen oxide emissions constrained by space-based observations of NO<sub>2</sub> columns. *Journal of Geophysical Research: Atmospheres*, 108(D17). <https://doi.org/10.1029/2003JD003453>
- Cooper, M., Martin, R. V., Padmanabhan, A., & Henze, D. K. (2017). Comparing mass balance and adjoint methods for inverse modeling of nitrogen dioxide columns for global nitrogen oxide emissions. *Journal of Geophysical Research: Atmospheres*, 122(8), 4718–4734. <https://doi.org/10.1002/2016JD025985>
- Mousavinezhad, S., Choi, Y., Pouyaei, A., Ghahremanloo, M., & Nelson, D. L. (2021). A comprehensive investigation of surface ozone pollution in China, 2015–2019: Separating the contributions from meteorology and precursor emissions. *Atmospheric Research*, 257, 105599. <https://doi.org/10.1016/j.atmosres.2021.105599>
- Chen, L., Fei, Y., Wang, R., Fang, P., Han, J., & Zha, Y. (2021). Retrieval of High Temporal Resolution Aerosol Optical Depth Using the GOCI Remote Sensing Data. *Remote Sensing*, 13(12), 2376. <https://doi.org/10.3390/rs13122376>
- Caporale, G. M., Carmona-González, N., & Gil-Alana, L. A. (2022). Atmospheric Pollution in Chinese Cities: Trends and Persistence (SSRN Scholarly Paper No. 4309213). <https://doi.org/10.2139/ssrn.4309213>
- Chen, L., Mao, F., Hong, J., Zang, L., Chen, J., Zhang, Y., Gan, Y., Gong, W., & Xu, H. (2022). Improving PM<sub>2.5</sub> predictions during COVID-19 lockdown by assimilating multi-source observations and adjusting emissions. *Environmental Pollution*, 297, 118783. <https://doi.org/10.1016/j.envpol.2021.118783>
- Li, K., Ni, R., Jiang, T., Tian, Y., Zhang, X., Li, C., & Xie, C. (2022). The regional impact of the COVID-19 lockdown on the air quality in Ji'nan, China. *Scientific Reports*, 12(1), Article 1. <https://doi.org/10.1038/s41598-022-16105-6>
- Carmichael, G.R., Streets, D.G., Calori, G., Amann, M., Jacobson, M.Z., Hansen, J., & Ueda, H. (2002). Changing trends in sulfur emissions in Asia: Implications for acid deposition. *Environ. Sci. Technol.*, 36, 4707–4713, [doi:10.1021/es011509c](https://doi.org/10.1021/es011509c).
